# Supplementary material for: Simultaneous and sensitive detection of dopamine and acetaminophen at a glassy carbon electrode modified with a carbonized-ZIF-67/Super P nanocomposite
Source: Royal Society of Chemistry journal article supplement (doi:10.1039/d3nj05135h), 2024-01-01
Supplement: d3nj05135h1.pdf [file d3nj05135h1.pdf]

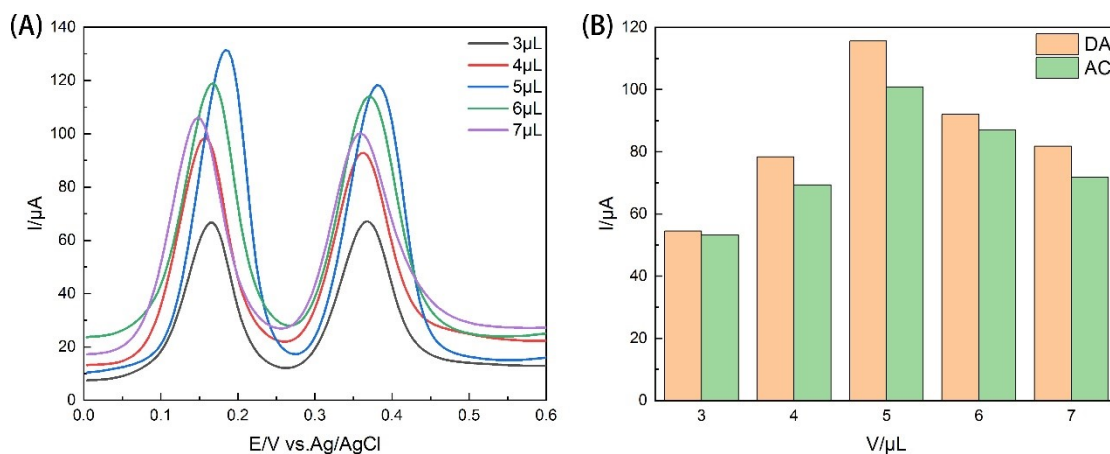

**Fig.S1** (A) DPVs of C-ZIF-67/SP/GCE at different dropping amount, (B) Histogram of the relationship between dropping amount and peak height.
